# Supplementary material
Source: publisher site journal article supplement (https://www.dovepress.com/article/576298)
Supplement: Supplementary file 1 [file 576298_Supplementary%20file%201.docx]

**Supplementary file 1 - PRISMA-ScR Checklist**

This narrative review was conducted in alignment with the PRISMA-ScR (Preferred Reporting Items for Systematic Reviews and Meta-Analyses Extension for Scoping Reviews) framework to enhance transparency and reproducibility. The checklist below indicates where each PRISMA-ScR item is addressed in the manuscript.

| **PRISMA-ScR Item** | **Description** | **Manuscript Section** |
| --- | --- | --- |
| Title | Identification as a review | Title |
| Abstract | Structured summary | Abstract |
| Rationale | Rationale for the review | Introduction |
| Objectives | Review objectives and scope | Introduction |
| Eligibility criteria | Inclusion/exclusion criteria | Methods – Eligibility Criteria |
| Information sources | Databases searched | Methods – Data Sources |
| Search strategy | Search terms and timeframe | Methods – Search Strategy |
| Selection of sources | Screening and selection process | Methods – Screening and Selection |
| Data charting process | Data extraction approach | Methods – Data Extraction |
| Data items | Variables extracted | Methods – Data Extraction |
| Critical appraisal | Quality considerations | Methods – Quality Considerations |
| Synthesis of results | Thematic synthesis | Methods – Data Synthesis |
| Limitations | Review limitations | Limitations |
| Conclusions | Summary and implications | Discussion, Conclusion |

The PRISMA-ScR checklist is provided to demonstrate adherence to reporting standards; however, consistent with the narrative and interpretative nature of this review, formal quantitative synthesis and meta-analysis were not undertaken.
